# Supplementary material for: A comparative study of electrical and opto-electrical properties of a few-layer p-WSe2/n-WS2 heterojunction diode on SiO2 and h-BN substrates
Source: Royal Society of Chemistry journal article supplement (doi:10.1039/d1ra01231b), 2021-01-01
Supplement: d1ra01231b1.pdf [file d1ra01231b1.pdf]

## Supporting information

Pradeep Raj Sharma<sup>1</sup>, Praveen Gautam<sup>1</sup>, Amir Muhammad Afzal<sup>2</sup>, Byoungchoo Park<sup>2</sup>, and Hwayong Noh<sup>1\*</sup>

1. Department of Physics and Astronomy, Sejong University, Seoul 05006, Republic of Korea

2. Department of Electrical and Biological Physics, Kwangwoon University, Seoul  
01897, Republic of Korea

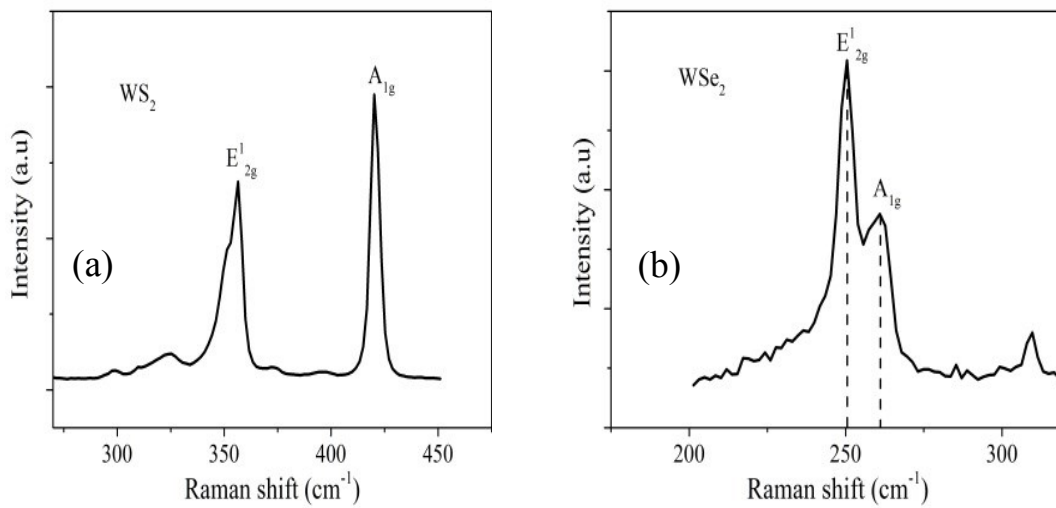

Figure S1. Raman spectroscopy, showing typical Raman spectral peaks of FL (a) WS<sub>2</sub> (b) WSe<sub>2</sub>, at a laser excitation wavelength of 514 nm.

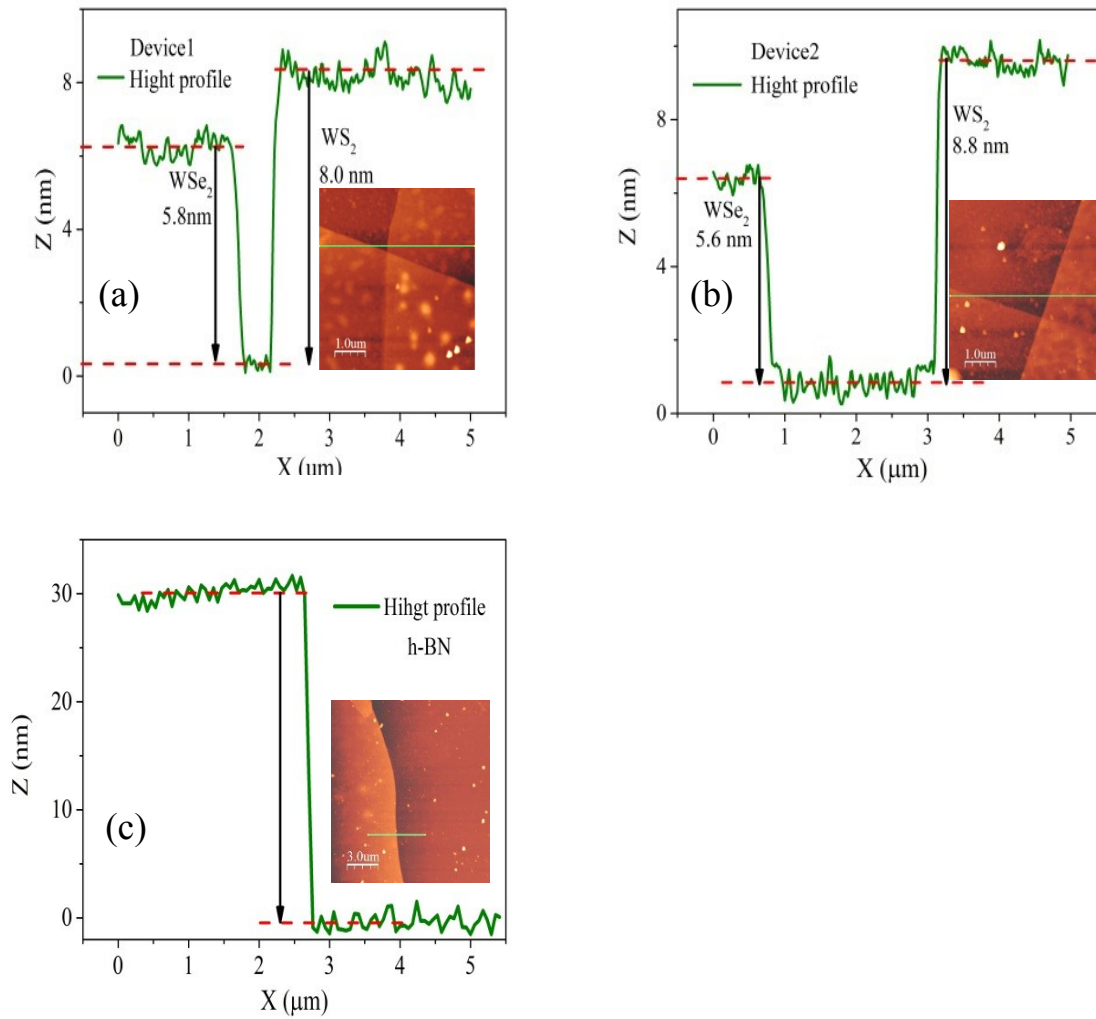

Figure S2. Atomic force microscopy, showing height profiles of TMDs along with their inset topographical images. (a) and (b) Height profile of  $\text{WSe}_2$  and  $\text{WS}_2$  for device1 and device2 respectively. (c) Height profile of h-BN used as a supporting base for device2.

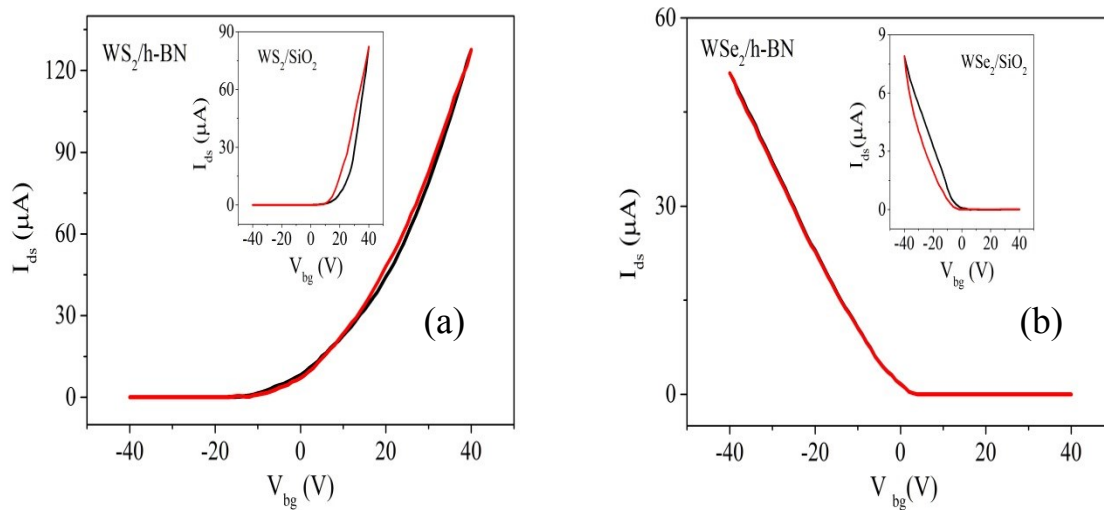

Figure S3. Hysteresis behavior ( $I_{ds}$ - $V_{bg}$ ) curve at  $V_{ds}=1$  V on h-BN substrate for (a)  $\text{WSe}_2$  (b)  $\text{WS}_2$ , whereas each inset figure show that on  $\text{SiO}_2$  substrate.

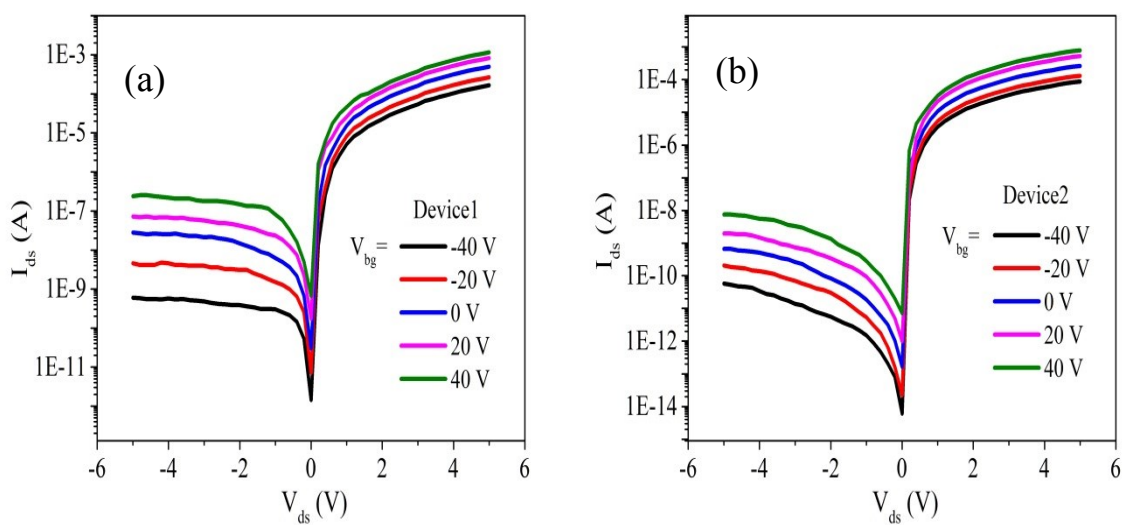

Figure S4. Back-gate dependent diode  $I_{ds}$ - $V_{ds}$  curves plotted in the semi-log scale for (a) device1 and (b) device2.
